# Supplementary material for: Identifying active sites of Co 3 O 4 catalysts for C 2 H 2 oxidation using combined computational and experimental methods
Source: Royal Society of Chemistry journal article supplement (doi:10.1039/d4en00358f), 2024-01-01
Supplement: d4en00358f1.pdf [file d4en00358f1.pdf]

## **Identifying Active Sites of $\text{Co}_3\text{O}_4$ Catalysts towards $\text{C}_2\text{H}_2$**

### **Oxidation by Combined Computational and Experimental Methods**

Jianlin Deng, Meng Gao, Meng Wang, Yaozhao Li, Weiyu Song, Lu Wang, Huiling Zheng, Jian  
Liu\*

**S1. Calculation methods**

**S2. Analytical methods**

**S3. Microkinetic methods**

**S4. Results**

## 1. Computational methods

Density Function Theory (DFT) studies were performed with the Vienna Ab Initio Simulation Package (VASP) [1, 2], using the spin-polarized approach. The exchange-correlation and the core-valence electron interaction were described by the Perdew-Burke-Erzonhoff (PBE) of the generalized-gradient approximation (GGA) [3] and the projector augmented wave (PAW) method [4], respectively. In all calculations, the electronic energies and force threshold were  $-0.05$  eV/Å and  $10^{-4}$  eV for the optimization and transition-state search, respectively. The cutoff energy was set of 400 eV and a  $3 \times 2 \times 1$   $k$ -point mesh was used for  $\text{Co}_3\text{O}_4$  surface slabs. It is necessary to consider Coulomb and exchange interactions of  $\text{Co}_3\text{O}_4$  [5, 6], for its highly correlated electronic states.  $U = 3$  was adopted to provide a better description of the electronic structure and the surface reactivity [7]. The optimized bulk lattice parameter is 8.135 Å, which is close to the experimental value of 8.08 Å and the calculational value of 8.16 Å [8]. The magnetic moment of  $\text{Co}^{2+}$  ( $\mu_{\text{Co}^{2+}}$ ) calculated in our work is 2.67  $\mu\text{B}$ , which is in accordance with the reference [7]. The climbing-image nudged elastic band module was employed to locate the transition states [9], the found of which were further verified to be a first-order saddle point by numerical frequency analysis.

The adsorption energy of surface species is calculated by the way that the energy after adsorption minus the sum of energies of the surface and gas before adsorption respective. In general, a negative adsorption energy indicates that the adsorption process is exothermic. The oxygen vacancy formation energy was calculated by subtracting  $\text{Co}_3\text{O}_4$  surface energy from the total energy of the defective  $\text{Co}_3\text{O}_4$  surface and half an oxygen molecule.

## 2. Analytical Methods

X-ray diffraction (XRD) spectrum were acquired on a Bruker D8 Advance powder X-ray diffractometer using  $\text{CuK}\alpha$  ( $k = 0.15406$  nm) radiation with a Nickel filter. The operating voltage and current is 40 kV and 40 mA, respectively. And the scanning rate in the  $2\theta$  range of  $10$ - $90^\circ$  is  $4^\circ/\text{min}$ . JCP-DS reference data were used for phase identification of XRD spectra. Brunauer–Emmet–Teller (BET) surface areas were calculated using an SSA6000 instrument. Samples were pretreated at  $150^\circ\text{C}$  for 5 h in vacuum. Quanta 200F field emission Scanning Electron Microscopy (SEM) was used to observe the surface morphology of the catalysts (accelerating

voltages of 5 kV). The SEM samples were sprinkled on conducting resin and coated with 10 nm Au before measurements. The transmission electron microscopy (TEM) and high-resolution TEM (HRTEM) images were observed by using a JEOL JEM-2100 transmission electron microscope. The TEM sample was obtained by dropping the nanoparticles/ethanol mixture onto a carbon-coated copper grid. PHI-1600 ESCA instrument was used to get the X-ray photoelectron spectroscopy (XPS) measurements with Mg, K $\alpha$  as the excitation source. The O<sub>2</sub>-TPD and H<sub>2</sub>-TPR was performed using Micromeritics AutoChem 2920 equipment and Quanta-chrome Autosorb-iQ-TPX, respectively. TPO-MS (Hiden QIC-20) analysis was performed to investigate CO<sub>2</sub> generated from the residual carbon and C<sub>2</sub>H<sub>2</sub>. The TPO is the same as the above. Reactant gases (50 mL/min, balanced with Ar) contain 10% O<sub>2</sub> with and without 150ppm C<sub>2</sub>H<sub>2</sub>, respectively. The relative intensity of outlet gas CO<sub>2</sub> was analyzed by MS.

### 3. Microkinetic methods

The microkinetic simulation is performed by MKMCXX software [10]. The reaction rate constant can be calculated by the Eyring equation (3):

$$k = Ae^{-\frac{E_a}{k_b T}} \quad (3)$$

where k is reaction rate constant; E<sub>a</sub> is the activation barrier; k<sub>b</sub> is Boltzmann constant; A is the prefactor; T is temperature in Kelvin.

The adsorption and desorption rates of non-activated molecular are derived from the Hertz-Knudsen kinetics by equation (4-6) [11]:

$$k_{ads} = S \frac{PA}{\sqrt{2\pi m k_b T}} \quad (4)$$

$$k_{des} = A \frac{k_b T^3}{h^3} \frac{2\pi k_b}{\sigma \theta_{rot}} \exp\left(\frac{-E_{des}}{RT}\right) \quad (5)$$

$$r = k_{ads} \cdot p_A - k_{des} \cdot [A_{ads}] \quad (6)$$

Here S is the sticking coefficient; P is the partial pressure of adsorbate in the gas; A is the area of the surface site; m is the mass of the molecule,  $\sigma$  is the symmetry number, and  $\theta_{rot}$  represent the characteristic temperature for rotation, respectively.

For the elementary reaction step, the rate constant of M components is derived by the differential equation (7):

$$r_i = \sum_{j=1}^N \left( k_j \nu_i^j \prod_{k=1}^M c_k^{\nu_k^j} \right) \quad (7)$$

Where  $\nu_i$ ,  $k_j$  and  $c_k$  are the stoichiometric coefficient of component i in reaction step k, reaction rate constant and the concentration of component k on the surface.

The degree of rate control ( $X_{RC}$ ), which represents the variance of the overall rate of each steps on slight changes in the energy of transition state, is calculated by equation (8):

$$X_{RC,i} = \frac{k_i}{r} \left( \frac{\partial r}{\partial k_i} \right)_{k_{j \neq i}, K_i} = \left( \frac{\partial \ln r}{\partial \ln k_i} \right)_{k_{j \neq i}, K_i} \quad (8)$$

Where  $k_i$  is the rate constant;  $K_i$  stands for the equilibrium constant, and r represents the reaction rate.

#### 4. Results

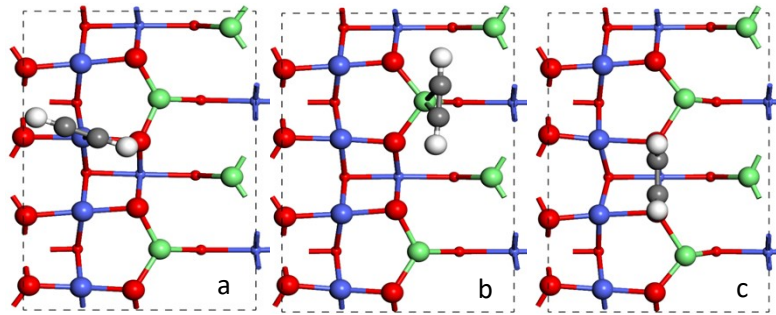

**Fig. S1.** The adsorption configurations of  $C_2H_2$  on different sites of  $Co_3O_4$  (110)-A surface.  $Co^{3+}$  site (a),  $Co^{2+}$  site (b),  $O_{3c}$  sites (c). The corresponding adsorption energy for a, b and c is -0.42, -0.62 and -2.55eV, respectively.

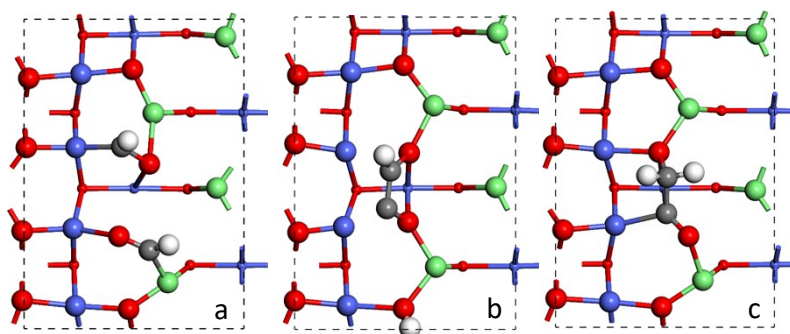

**Fig. S2.** The configurations formed by the cleavage of C-C and C-H bond of  $C_2H_2$  on  $Co_3O_4$  (110)-A surface. direct C-C cleavage (a), C-H cleavage ( $H \rightarrow O_{3c}$ ) (b), C-H cleavage (inner-molecular H shift) (c).

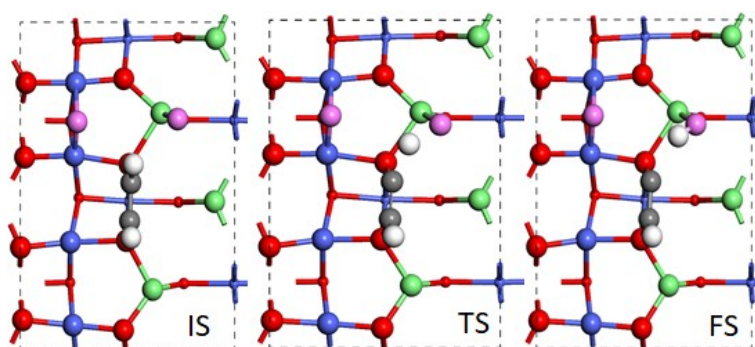

**Fig. S3.** The dehydrogenation path of  $CHCH$  on  $Co_3O_4$  (110)-A surface. IS, TS and FS indicates initial state, transition state and final state, respectively.

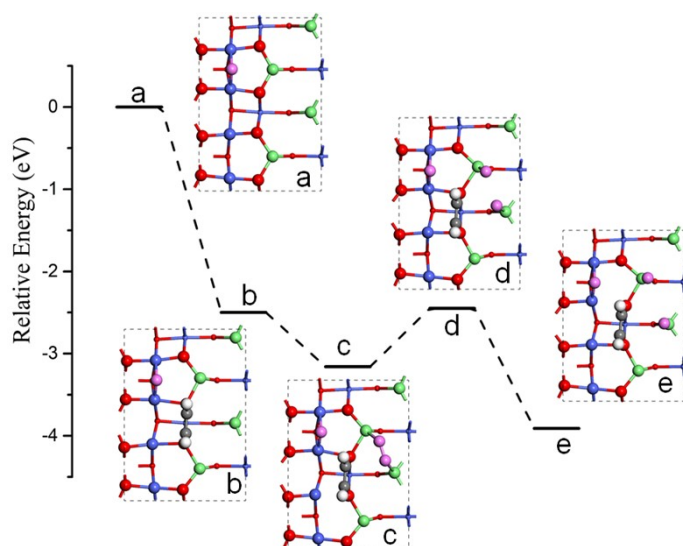

**Fig. S4.** The reaction path of the residual O in the next reaction cycle. The residual O (a); The adsorption of  $C_2H_2$  (b); the adsorption of  $O_2$  (c); the transition state of  $O_2$  dissociation (d); the dissociation of  $O_2$  (e).

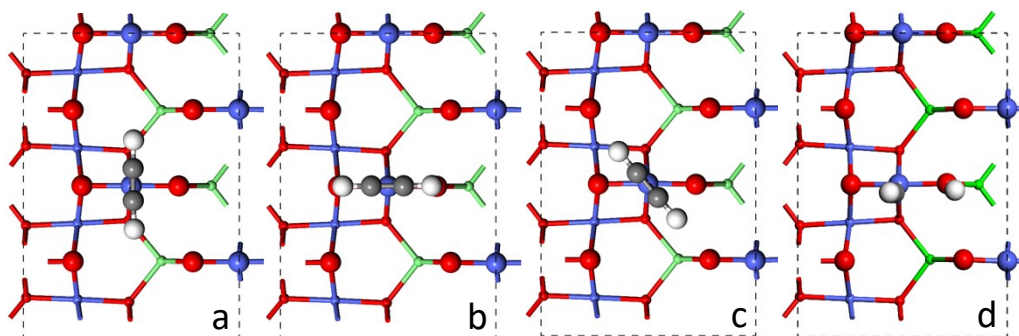

**Fig. S5.** The adsorption (a, b, c) and dissociation (d) configurations of  $C_2H_2$  on  $Co_3O_4$  (110)-B surface. The calculated adsorption energy for a, b and c is -0.4, -0.33 and -0.46 eV, respectively.

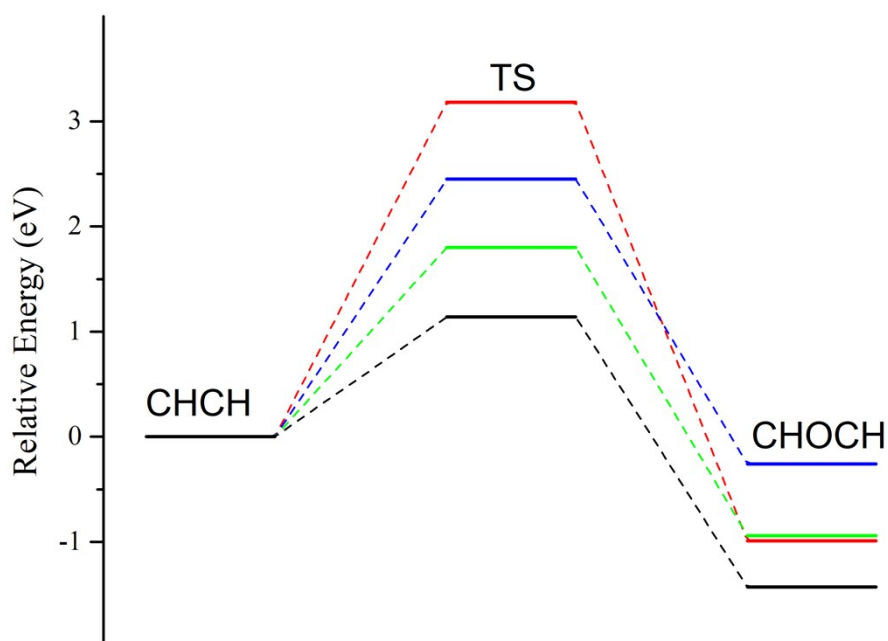

**Fig. S6.** The energy diagram for CHCH and different O atoms to form CHOCH. Lattice  $O_{3c}$  (red), lattice  $O_{2c}$  (blue), the adsorption O of the three-membered ring structure (green), the adsorption O of side-on structure (black).

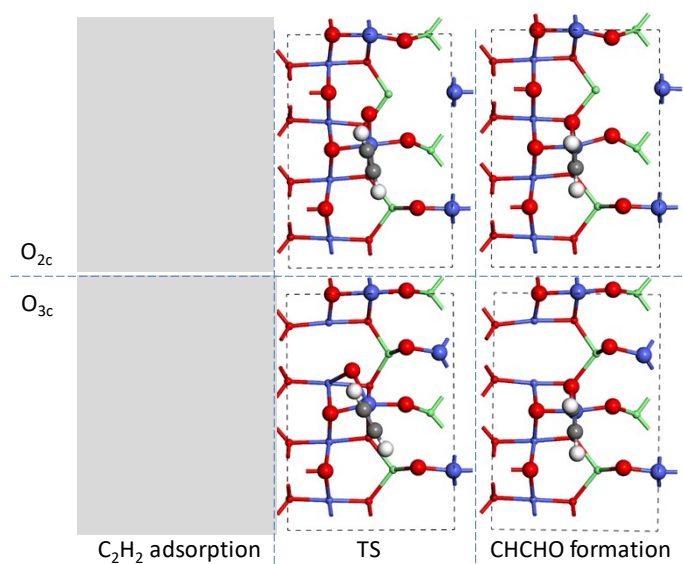

**Fig. S7.** The reaction process of  $C_2H_2$  with lattice oxygen ( $O_{2c}$  and  $O_{3c}$ ) to form CHCHO on  $Co_3O_4$  (110)-B surface.

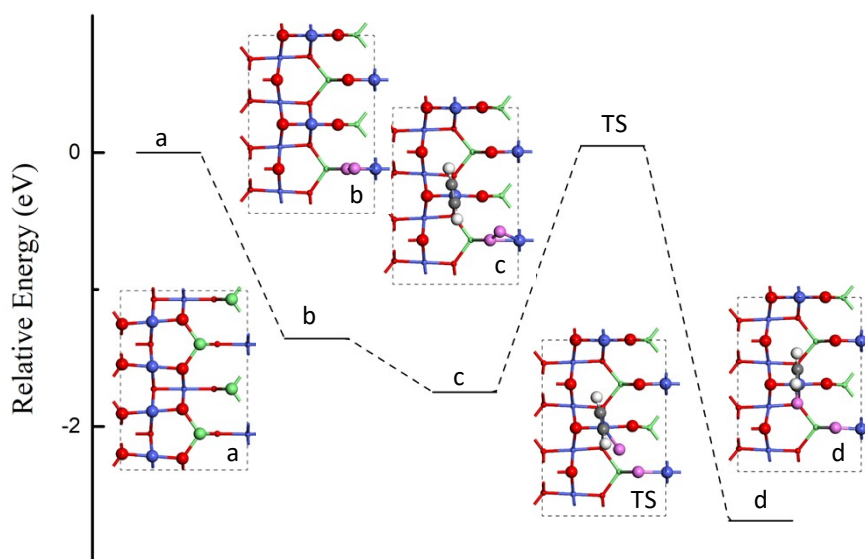

**Fig. S8.** The reaction process of  $C_2H_2$  with adsorbed oxygen (three-membered ring structure) to form CHCHO on  $Co_3O_4$  (110)-B surface.  $Co_3O_4$  (110)-B surface (a); the adsorption of  $O_2$  (b); the adsorption of  $C_2H_2$  (c); the formation of CHCHO (d).

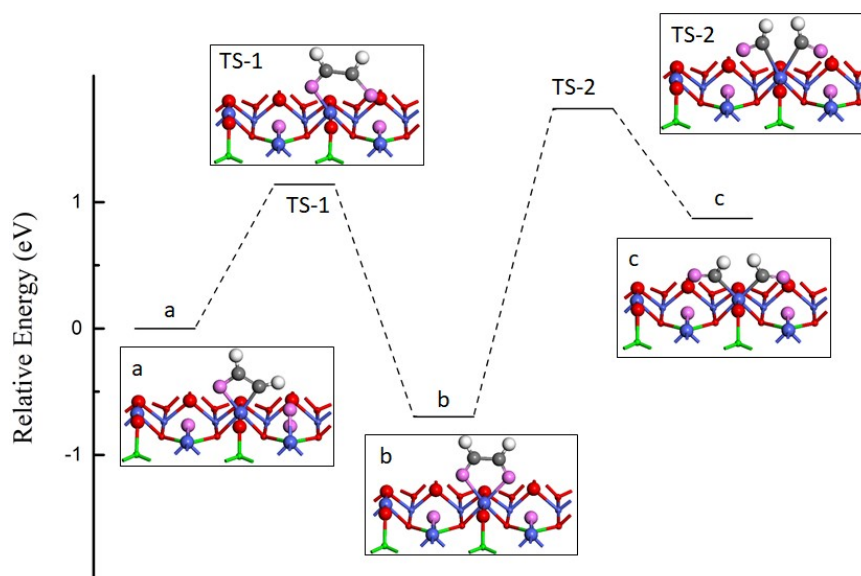

**Fig. S9.** The reaction path of CHOCH to CHO by forming CHOCHO species on  $\text{Co}_3\text{O}_4$  (110)-B surface. CHOCH (a), CHOCHO (b), CHO-CHO (c).

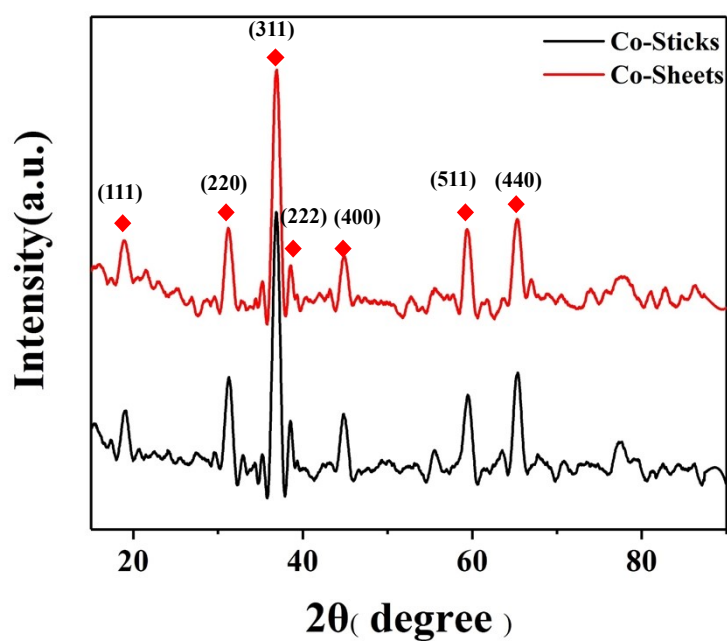

**Fig. S10.** XRD patterns of  $\text{Co}_3\text{O}_4$ -Sticks and  $\text{Co}_3\text{O}_4$ -Sheets catalysts prepared by hydrothermal synthesis method.



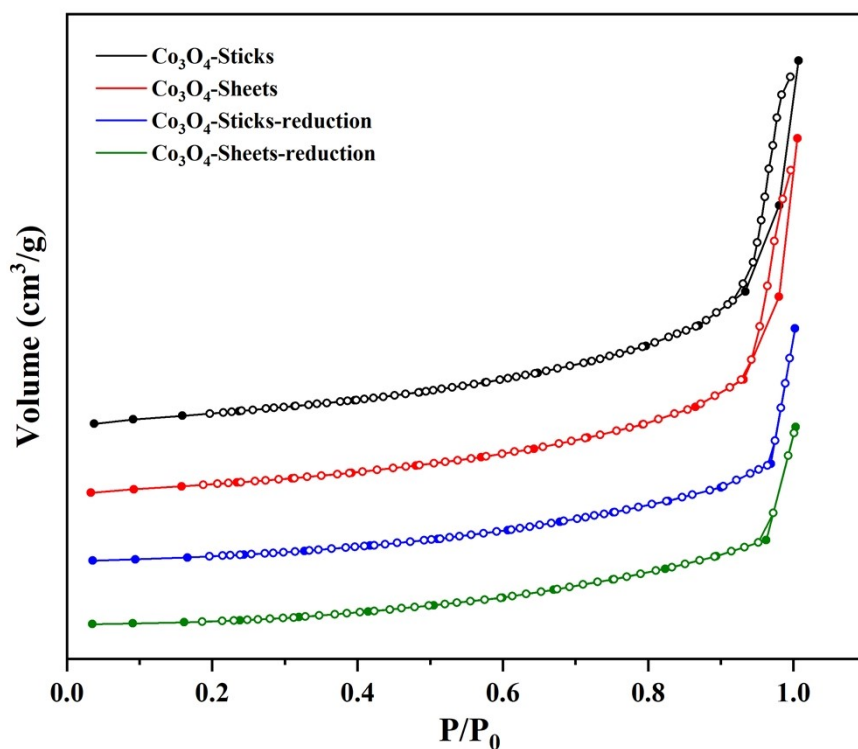

**Fig. S11.** N<sub>2</sub> adsorption–desorption isotherms of Co<sub>3</sub>O<sub>4</sub> catalysts.

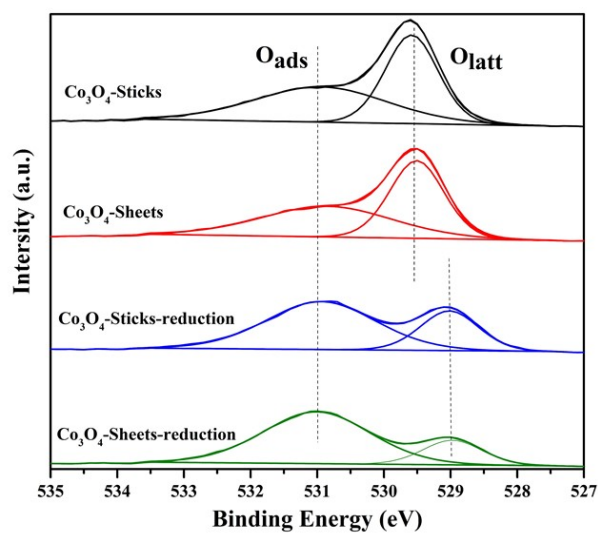

**Fig. S12.** X-ray photoelectron spectra of O 1s regions for Co<sub>3</sub>O<sub>4</sub>-Sticks, Co<sub>3</sub>O<sub>4</sub>-Sheets, Co<sub>3</sub>O<sub>4</sub>-Sticks-reduction and Co<sub>3</sub>O<sub>4</sub>-Sheets-reductions catalysts.

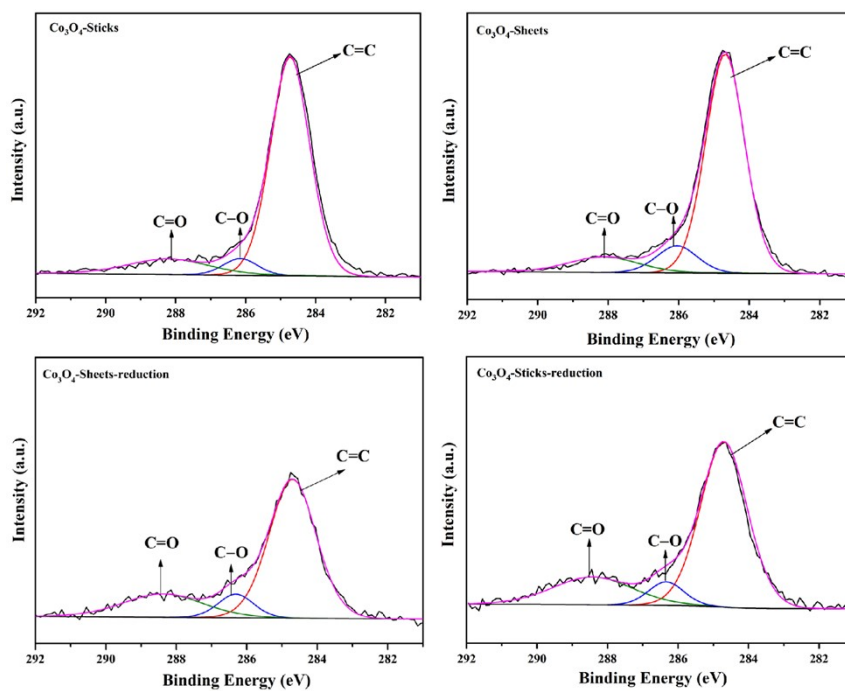

**Fig. S13.** X-ray photoelectron spectra of C 1s regions for  $\text{Co}_3\text{O}_4$ ,  $\text{Co}_3\text{O}_4$ -Sticks,  $\text{Co}_3\text{O}_4$ -Sheets,  $\text{Co}_3\text{O}_4$ -Sticks-reduction and  $\text{Co}_3\text{O}_4$ -Sheets-reductions catalysts.

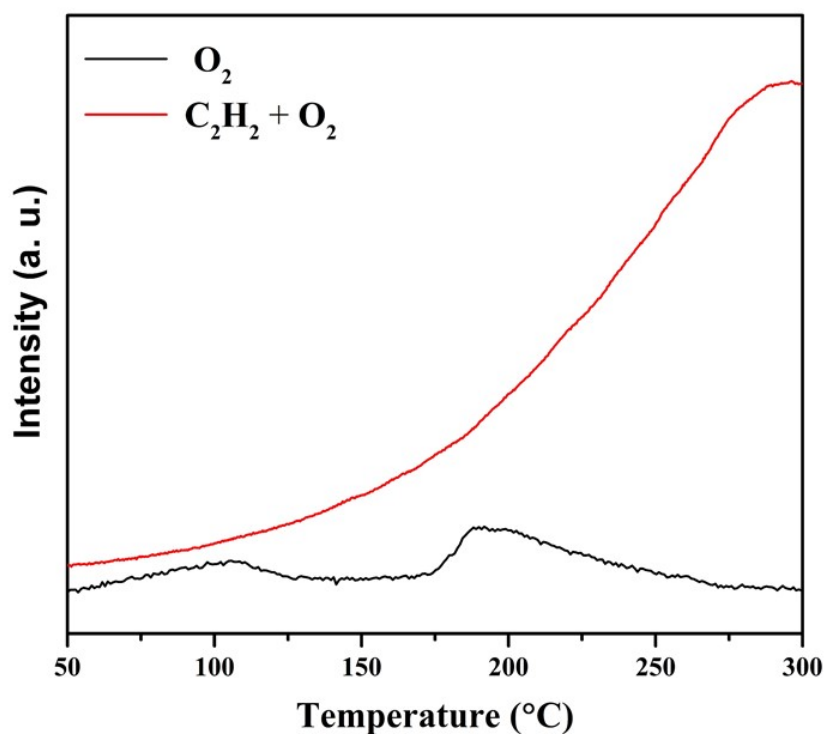

**Fig. S14.** The relative intensity of  $\text{CO}_2$  from TPO-MS.

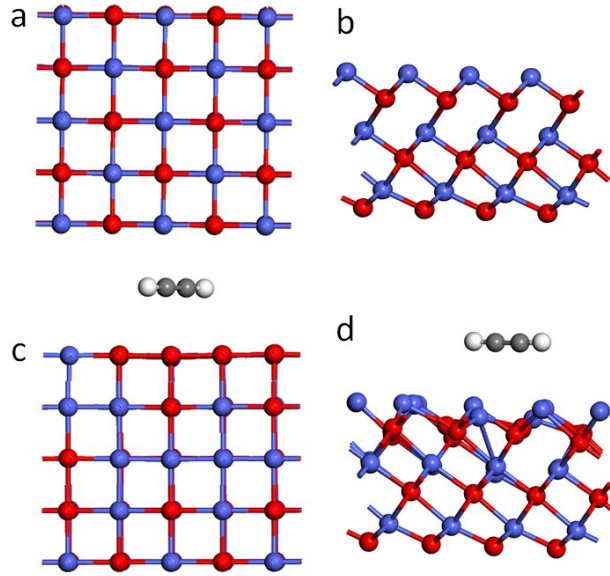

**Fig. S15.** The configurations of CoO (100) and (111) surface (a, b). The adsorption configurations of  $C_2H_2$  on CoO (100) and (111) surface (c, d).

Bulk CoO crystallizes in the rock salt structure, with both Co and O atoms in octahedral environments. Ground-state CoO exhibits type-II antiferromagnetic (AFM-II) spin ordering, with antiparallel ordering of adjacent (111) planes [12]. The  $U_{\text{eff}}$  was set as 4.1 eV, giving a lattice constant of 4.26 Å, in very good agreement with the experimental value of 4.262 Å [13]. We considered CoO (100) and (111) structures with AFM on Co ions in alternating planes along (100), and (111) direction, which have the lowest energy [14]. The CoO (100) and (111) surfaces were composed of 5 atomic layers, with a  $2 \times 2$  supercell. The vacuum between slabs was 12 Å, and a  $2 \times 2 \times 1$  k-point mesh was used. The bottom two layers were fixed, and the top three atomic layers were all relaxed. Co-terminated CoO (111) surface was adopted for its minimum adsorption energy.

**Table S1.** The temperature and the selectivity to CO<sub>2</sub> of C<sub>2</sub>H<sub>2</sub> combustion over as-prepared Co<sub>3</sub>O<sub>4</sub> catalysts.

| Catalysts                                        | T <sub>10</sub> /°C | T <sub>50</sub> /°C | T <sub>100</sub> /°C | S <sub>CO<sub>2</sub></sub> <sup>m</sup> /% |
|--------------------------------------------------|---------------------|---------------------|----------------------|---------------------------------------------|
| Co <sub>3</sub> O <sub>4</sub> -Sticks           | 162                 | 230                 | 254                  | 100.0                                       |
| Co <sub>3</sub> O <sub>4</sub> -Sheets           | 107                 | 164                 | 198                  | 100.0                                       |
| Co <sub>3</sub> O <sub>4</sub> -Sticks-reduction | 149                 | 217                 | 236                  | 100.0                                       |
| Co <sub>3</sub> O <sub>4</sub> -Sheets-reduction | 104                 | 144                 | 166                  | 100.0                                       |

**Table S2.** Chemical and physical parameter and surface compositions of the different catalysts.

| Catalysts                                       | surface area (m <sup>2</sup> /g) | particle size (nm) | Co <sup>2+</sup> /Co <sup>3+</sup> | O <sub>ads</sub> /O <sub>latt</sub> | C concentrations (at. %) |
|-------------------------------------------------|----------------------------------|--------------------|------------------------------------|-------------------------------------|--------------------------|
| Co <sub>3</sub> O <sub>4</sub> -Stick           | 18.2                             | 10.7               | 0.40                               | 1.09                                | 8.86                     |
| Co <sub>3</sub> O <sub>4</sub> -Sheet           | 15.7                             | 14.4               | 1.07                               | 1.07                                | 8.01                     |
| Co <sub>3</sub> O <sub>4</sub> -Stick-reduction | 9.8                              | 10.7               | 0.56                               | 2.21                                | 8.88                     |
| Co <sub>3</sub> O <sub>4</sub> -Sheet-reduction | 6.7                              | 14.4               | 1.64                               | 3.76                                | 8.14                     |

**Table S3.** The activation energy, forward and backward rate constants of each elementary reaction step of C<sub>2</sub>H<sub>2</sub> oxidation on Co<sub>3</sub>O<sub>4</sub> (110)-A surface.

| Reaction steps                                                                  | activation energy (kJ/mol) | forward rate constants | backward rate constants | degree of rate control |
|---------------------------------------------------------------------------------|----------------------------|------------------------|-------------------------|------------------------|
| CHCH + * → CHCH*                                                                | 0                          | 8.876                  | 2.635e-8                | 0                      |
| O <sub>2</sub> + # → O <sub>2</sub> #                                           | 0                          | 3.417e4                | 3.415e4                 | 2.078e-8               |
| O <sub>2</sub> # → O-O#                                                         | 62.5                       | 8.876                  | 3.974e-11               | 4.541e-5               |
| CHCH* + O-O# → CHCHO* + O#                                                      | 1.9                        | 8.876                  | 8.092e-9                | 1.151e-11              |
| CHCHO* + O <sub>2</sub> # → CHOCHO* + O#                                        | 1.0                        | 8.876                  | 2.249e-22               | 7.726e-7               |
| CHOCHO* → CHO-CHO*                                                              | 109.6                      | 8.876                  | 1.700e-3                | 9.998e0                |
| CHO-CHO* + O# → CO <sub>2</sub> -CHO* + OH#                                     | 57.7                       | 8.876                  | 3.382e-4                | 2.000e-4               |
| CO <sub>2</sub> -CHO* + O# → CO <sub>2</sub> -CO <sub>2</sub> * + OH#           | 57.7                       | 8.876                  | 6.824e-33               | 3.895e-6               |
| CO <sub>2</sub> -CO <sub>2</sub> * → 2 CO <sub>2</sub> (g) + O <sub>vac</sub> * | 0                          | 0                      | 8.876                   | 5.129e-14              |
| O <sub>vac</sub> * + O <sub>2</sub> → *                                         | 0                          | 8.876                  | 1.938e-27               | 2.078e-8               |
| 2 OH# → H <sub>2</sub> O# + #                                                   | 50                         | 8.876                  | 2.180e-3                | 6.099e-7               |
| H <sub>2</sub> O# → H <sub>2</sub> O(g) + #                                     | 0                          | 8.876                  | 0                       | 4.994e-6               |

## References

- [1] Fuchs, M.; Scheffler, M. Ab initio pseudopotentials for electronic structure calculations of poly-atomic systems using density-functional theory, *Comput. Phys. Commun.* **1999**, *119*, 67-98.
- [2] Zhao, Y. Deng, C.; Tang, D.; Ding, L.; Zhang, Y.; Sheng, H.; Ji, H.; Song, W.; Ma, W.; Chen, C.; Zhao, J.  $\alpha$ -Fe<sub>2</sub>O<sub>3</sub> as a versatile and efficient oxygen atom transfer catalyst in combination with H<sub>2</sub>O as the oxygen source, *Nature Catal.* **2021**, *4*, 684-691.
- [3] J. P. Perdew, K. Burke, M. Ernzerhof, Generalized Gradient Approximation Made Simple, *Phys. Rev. Lett.* **1996**, *77*, 3865-3868.
- [4] P. E. Blöchl, Projector augmented-wave method, *Phys. Rev. B* **1994**, *50*, 17953-17979.
- [5] V. I. Anisimov, J. Zaanen, O. K. Andersen, Band theory and Mott insulators: HubbardU instead of StonerI, *Phys. Rev. B* **1991**, *44*, 943-954.
- [6] V. I Anisimov, F Aryasetiawan, A I Lichtenstein, First-principles calculations of the electronic structure and spectra of strongly correlated systems: the LDA+U method, *J. Phys.: Condens. Matter* **1997**, *9*, 767-808.
- [7] S. Selcuk, A. Selloni, DFT+U Study of the Surface Structure and Stability of Co<sub>3</sub>O<sub>4</sub>(110): Dependence on U, *J. Phys. Chem. C* **2015**, *119*, 9973-9979.
- [8] S. Kenmoe, D. H. Douma, A. T. Raji, B. M'Passi-Mabiala, T. Götsch, F. Girgsdies, A. Knop-Gericke, R. Schlögl, E. Spohr, X-ray Absorption Near-Edge Structure (XANES) at the O K-Edge of Bulk Co<sub>3</sub>O<sub>4</sub>: Experimental and Theoretical Studies, *Nanomaterials* **2022**, *12*, 921.
- [9] G. Henkelman, H. Jónsson, Improved tangent estimate in the nudged elastic band method for finding minimum energy paths and saddle points, *J. Chem. Phys.* **2000**, *113*, 9978.
- [10] X. Zhang, J. Liu, B. Zijlstra, I. A. W. Filot, Z. Zhou, S. Sun, E. J. M. Hensen, Optimum Cu nanoparticle catalysts for CO<sub>2</sub> hydrogenation towards methanol, *Nano Energy* **2018**, *43*, 200-209.
- [11] P. Nitoń, A. Żywociński, M. Fiałkowski, R. Hołyst, A “nano-windmill” driven by a flux of water vapour: a comparison to the rotating ATPase, *Nanoscale* **2013**, *5*, 9732-9738.
- [12] Wdowik, U.; Parlinski, K. Lattice dynamics of CoO from first principles. *Phys. Rev. B*, **2007**, *75*, 104306.
- [13] Deng, H.; Li, J.; Li, S.; Xia, J.; Walsh, A.; Wei, S. Origin of antiferromagnetism in CoO: A density functional theory study. *Appl. Phys. Lett.*, **2010**, *96*, 162508.
- [14] Park, K.; Kolpak, A. Understanding photocatalytic overall water splitting on CoO nanoparticles: Effects of facets, surface stoichiometry, and the CoO/water interface. *J. Catal.*, **2018**, *365*, 115-124.
